# Supplementary material
Source: MDPI journal article supplement (https://www.mdpi.com/2077-0472/13/5/1096)
Supplement: s1 [file s1]

## **Supplementary Materials**

### **Nutritional and Health Values of Tunisian Edible Oils from Less-Used Plant Sources**

Rossella Vadalà <sup>1</sup>, Vincenzo Nava <sup>1</sup>, Vincenzo Lo Turco <sup>1,\*</sup>, Angela Giorgia Potorti <sup>1</sup>, Rosaria Costa <sup>1</sup>, Rossana Rando <sup>1</sup>, Hedi Ben Mansour <sup>2</sup>, Nawres Ben Amor <sup>2,3</sup>, Asma Beltifa<sup>5</sup>, Antonello Santini <sup>6,\*</sup> and Giuseppa Di Bella <sup>1</sup>

Table S1. Operative conditions for the microwave oven digestion.

| Step | Time   | Temperature | Microwave power |
|------|--------|-------------|-----------------|
| 1    | 15 min | 0-180 °C    | 1000 W          |
| 2    | 15 min | 180 °C      | 1000 W          |
| 3    | 20 min | Cooling     |                 |

Table S2. ICP-MS Experimental parameters.

|                                |                                                     |
|--------------------------------|-----------------------------------------------------|
| Spectrometer                   | iCAP Q Thermo scientific with Qcell Reaction System |
| Nebulizer                      | 0 rps Concentric PFA                                |
| RF generator                   | 1550 W                                              |
| Sample depth                   | 5 mm                                                |
| Interface                      | Sample and skimmer cones in Ni                      |
| Interface pressure             | 1.89 E+00 Pa                                        |
| Carrier gas flow rate          | 1.1 L min <sup>-1</sup>                             |
| Plasma gas flow rate           | 14 L min <sup>-1</sup>                              |
| Auxiliary gas flow rate        | 0.8 L min <sup>-1</sup>                             |
| Helium collision gas flow rate | 4.7 L min <sup>-1</sup>                             |
| Spray chamber temperature      | 2.7 C°                                              |
| Scanning condition             | Number of replicates: 3, dwell time: 1s             |
| Vacuum                         | < 7,5E-07 Pa                                        |

### S.1 Validation of analytical methods

Analytical methods for mineral elements determination were validated with the help of commercial standards in terms of linearity, limit of detection (LOD) and limit of quantification (LOQ), according to Eurachem criteria<sup>1</sup>. Linearity was assessed by means of calibration curves of each analyte, constructed according to the linear least-square regression method. Specifically, seven-point calibration curves were obtained using mixed working standard solutions in the following concentrations: 0.5, 1.0, 2.0, 5.0, 10, 20 and 50 µg L<sup>-1</sup> for Li, Be, B, Na, Mg, Al, K, Ti, V, Cr, Mn, Fe, Co, Ni, Cu, Zn, As, Se, Sr, Mo, Ag, Cd, Sb, Ba, Tl, Pb, and Bi. Each solution was injected six times (n = 6). LODs and LOQs were experimentally calculated as 3.3 σ/S and 10 σ/S, respectively, where σ is the standard deviation of the analytical blank (n=6) and S is the slope of the relative calibration curve. A good linearity was obtained for all elements investigated with R<sup>2</sup> values ranged from 0.9982 (for Na) to 0.9999 (for V). The limits of detection (LODs) ranged from 0.001 to 0.461 µg kg<sup>-1</sup>, and limits of quantification (LOQs) ranged from 0.003 to 1.521 µg kg<sup>-1</sup>. The lowest average recovery was observed for potassium with 91.13%, while the highest was obtained for arsenic with

102.56%. Accuracy was assessed by evaluating six determinations on certified reference material (Pine Needles NIST 1575) and was reported as the percent recovery between the value found with the calibration curve and the true value reported in the certified reference materials. When the element was not certified in the reference material, the matrix was spiked with the known amount of analyte and was analyzed following the procedures discussed before. Based on these results, the analytical characteristic (linearity, sensitivity, and accuracy) can be considered satisfactory for the purposes of the analysis.

*Table S3 - Analytical parameters for method validation.*

| PINE NEEDLES NIST 1575 |                             |                             |                |                               |                           |                 |
|------------------------|-----------------------------|-----------------------------|----------------|-------------------------------|---------------------------|-----------------|
| Element                | LOD<br>( $\mu\text{g/Kg}$ ) | LOQ<br>( $\mu\text{g/Kg}$ ) | R <sup>2</sup> | Experimental value<br>(mg/kg) | Expected value<br>(mg/kg) | Recovery<br>(%) |
| Li                     | 0.001                       | 0.003                       | 0.9998         | 1.95*                         | 2.00*                     | 97.50           |
| Be                     | 0.001                       | 0.003                       | 0.9997         | 2.00*                         | 2.00*                     | 100.00          |
| B                      | 0.003                       | 0.010                       | 0.9997         | 9.1                           | 9.6                       | 94.79           |
| Na                     | 0.461                       | 1.521                       | 0.9982         | 60.00                         | 63.00                     | 95.24           |
| Mg                     | 0.031                       | 0.102                       | 0.9992         | 0.103                         | 0.106                     | 97.17           |
| Al                     | 0.021                       | 0.069                       | 0.9996         | 566                           | 580                       | 97.59           |
| K                      | 0.142                       | 0.469                       | 0.9989         | 0.380                         | 0.417                     | 91.13           |
| Ti                     | 0.002                       | 0.007                       | 0.9997         | 2.01*                         | 2.00*                     | 100.50          |
| V                      | 0.001                       | 0.003                       | 0.9999         | 2.02*                         | 2.00*                     | 101.00          |
| Cr                     | 0.001                       | 0.003                       | 0.9998         | 0.38                          | 0.40                      | 95.00           |
| Mn                     | 0.002                       | 0.007                       | 0.9997         | 478                           | 488                       | 97.95           |
| Fe                     | 0.021                       | 0.069                       | 0.9996         | 43.5                          | 46.0                      | 94.57           |
| Co                     | 0.001                       | 0.003                       | 0.9997         | 0.060                         | 0.061                     | 98.36           |
| Ni                     | 0.001                       | 0.003                       | 0.9998         | 1.43                          | 1.47                      | 97.28           |
| Cu                     | 0.014                       | 0.046                       | 0.9993         | 2.7                           | 2.8                       | 96.43           |
| Zn                     | 0.027                       | 0.089                       | 0.9992         | 37.45                         | 38.00                     | 98.55           |
| As                     | 0.001                       | 0.003                       | 0.9997         | 0.040                         | 0.039                     | 102.56          |
| Se                     | 0.042                       | 0.139                       | 0.9991         | 0.095                         | 0.099                     | 95.96           |
| Sr                     | 0.003                       | 0.010                       | 0.9997         | 1.99*                         | 2.00*                     | 99.50           |
| Mo                     | 0.002                       | 0.007                       | 0.9998         | 2.00*                         | 2.00*                     | 100.00          |

|           |       |       |        |        |        |        |
|-----------|-------|-------|--------|--------|--------|--------|
| <b>Ag</b> | 0.001 | 0.003 | 0.9998 | 1.97*  | 2.00*  | 98.50  |
| <b>Cd</b> | 0.001 | 0.003 | 0.9998 | 0.225  | 0.233  | 96.57  |
| <b>Sb</b> | 0.002 | 0.007 | 0.9997 | 1.95*  | 2.00*  | 97.50  |
| <b>Ba</b> | 0.004 | 0.013 | 0.9997 | 6.08   | 6.00   | 101.33 |
| <b>Tl</b> | 0.002 | 0.007 | 0.9997 | 1.98*  | 2.00*  | 99.00  |
| <b>Pb</b> | 0.002 | 0.007 | 0.9998 | 0.170  | 0.167  | 101.80 |
| <b>Bi</b> | 0.003 | 0.010 | 0.9996 | 1.99*  | 2.00*  | 99.50  |
| <b>Hg</b> | 0.001 | 0.003 | 0.9998 | 0,0404 | 0.0399 | 101.25 |

\*Not Present in the certified matrix. Added later to the matrix.

Table S4. Contents (mg/100 g of oil) of single and total sterols in the investigated oils. expressed as mean  $\pm$  standard deviation of three samples (N=3). each of them was analysed in triplicate (n=3).

| Sterols                                        | Oil samples                    |                                |                                |                                |                                |                                 |
|------------------------------------------------|--------------------------------|--------------------------------|--------------------------------|--------------------------------|--------------------------------|---------------------------------|
|                                                | Apricot kernel                 | Bitter almond                  | Nigella                        | Pumpkin seed                   | Souchet                        | Wheat germ                      |
| <b>Colesterol</b>                              | 0.68 $\pm$ 0.04 <sup>a</sup>   | 0.55 $\pm$ 0.01 <sup>a</sup>   | 1.42 $\pm$ 0.07 <sup>b</sup>   | 0.52 $\pm$ 0.02 <sup>a</sup>   | 0.80 $\pm$ 0.05 <sup>a</sup>   | 1.67 $\pm$ 0.04 <sup>b</sup>    |
| <b>Brassicasterol</b>                          | 1.37 $\pm$ 0.26 <sup>a</sup>   | 0.00 $\pm$ 0.00 <sup>b</sup>   | 0.00 $\pm$ 0.00 <sup>b</sup>   | 0.00 $\pm$ 0.00 <sup>b</sup>   | 0.33 $\pm$ 0.05 <sup>c</sup>   | 0.00 $\pm$ 0.00 <sup>b</sup>    |
| <b>Campesterol</b>                             | 10.30 $\pm$ 1.22 <sup>a</sup>  | 6.22 $\pm$ 0.99 <sup>b</sup>   | 14.59 $\pm$ 2.37 <sup>c</sup>  | 7.16 $\pm$ 0.92 <sup>c</sup>   | 32.80 $\pm$ 3.399 <sup>c</sup> | 391.19 $\pm$ 9.01 <sup>c</sup>  |
| <b>Campestanol</b>                             | 1.05 $\pm$ 0.02 <sup>a</sup>   | 0.61 $\pm$ 0.01 <sup>a</sup>   | 1.32 $\pm$ 0.08 <sup>a</sup>   | 0.87 $\pm$ 0.04 <sup>a</sup>   | 1.04 $\pm$ 0.04 <sup>a</sup>   | 37.90 $\pm$ 2.25 <sup>b</sup>   |
| <b>Stigmasterol</b>                            | 28.97 $\pm$ 3.17 <sup>a</sup>  | 8.41 $\pm$ 1.17 <sup>b</sup>   | 18.22 $\pm$ 2.13 <sup>c</sup>  | 11.69 $\pm$ 1.31 <sup>b</sup>  | 35.04 $\pm$ 2.42 <sup>a</sup>  | 23.66 $\pm$ 2.15 <sup>a</sup>   |
| <b><math>\Delta^7</math>-campesterol</b>       | 0.86 $\pm$ 0.27 <sup>a</sup>   | 1.40 $\pm$ 0.27 <sup>a</sup>   | 1.41 $\pm$ 0.27 <sup>a</sup>   | 1.54 $\pm$ 0.27 <sup>a</sup>   | 1.59 $\pm$ 0.27 <sup>a</sup>   | 31.19 $\pm$ 0.27 <sup>b</sup>   |
| <b>Clerosterol</b>                             | 2.06 $\pm$ 3.23 <sup>a</sup>   | 2.07 $\pm$ 2.47 <sup>a</sup>   | 1.10 $\pm$ 2.36 <sup>a</sup>   | 4.08 $\pm$ 1.21 <sup>b</sup>   | 1.66 $\pm$ 2.15 <sup>a</sup>   | 10.19 $\pm$ 1.55 <sup>c</sup>   |
| <b><math>\beta</math>-Sitosterolo</b>          | 209.39 $\pm$ 2.32 <sup>a</sup> | 155.23 $\pm$ 3.97 <sup>b</sup> | 67.35 $\pm$ 4.27 <sup>c</sup>  | 107.43 $\pm$ 4.22 <sup>b</sup> | 121.57 $\pm$ 3.36 <sup>b</sup> | 987.57 $\pm$ 7.98 <sup>d</sup>  |
| <b><math>\Delta^5</math>-avenasterol</b>       | 25.26 $\pm$ 1.94 <sup>a</sup>  | 27.75 $\pm$ 1.91 <sup>a</sup>  | 19.56 $\pm$ 1.52 <sup>a</sup>  | 8.25 $\pm$ 1.18 <sup>b</sup>   | 5.84 $\pm$ 0.99 <sup>b</sup>   | 99.13 $\pm$ 2.33 <sup>c</sup>   |
| <b><math>\Delta^{5,24}</math>-stigmastanol</b> | 2.96 $\pm$ 0.09 <sup>a</sup>   | 2.88 $\pm$ 0.03 <sup>a</sup>   | 1.51 $\pm$ 0.04 <sup>a</sup>   | 30.92 $\pm$ 2.27 <sup>b</sup>  | 1.53 $\pm$ 0.07 <sup>a</sup>   | 24.73 $\pm$ 2.51 <sup>b</sup>   |
| <b><math>\Delta^7</math>-stigmastenol</b>      | 6.57 $\pm$ 1.13 <sup>a</sup>   | 5.33 $\pm$ 0.91 <sup>a</sup>   | 1.95 $\pm$ 0.89 <sup>b</sup>   | 20.32 $\pm$ 1.15 <sup>c</sup>  | 9.78 $\pm$ 1.67 <sup>a</sup>   | 37.96 $\pm$ 4.45 <sup>d</sup>   |
| <b><math>\Delta^7</math>-avenasterolo</b>      | 2.85 $\pm$ 0.09 <sup>a</sup>   | 2.38 $\pm$ 0.08 <sup>a</sup>   | 2.52 $\pm$ 0.09 <sup>a</sup>   | 25.37 $\pm$ 2.52 <sup>b</sup>  | 3.35 $\pm$ 0.05 <sup>a</sup>   | 67.63 $\pm$ 2.48 <sup>c</sup>   |
| <b>Total Sterols</b>                           | 285.3 $\pm$ 12.52 <sup>a</sup> | 212.8 $\pm$ 9.97 <sup>a</sup>  | 131.0 $\pm$ 5.691 <sup>b</sup> | 218.2 $\pm$ 11.05 <sup>a</sup> | 215.3 $\pm$ 10.42 <sup>a</sup> | 1713.8 $\pm$ 24.62 <sup>c</sup> |

Different superscript letters indicate significantly different values ( $p < 0.05$  by post hoc Tukey's HSD test); Same superscript letters in the same column indicate not significantly different values ( $p > 0.05$  by post hoc Tukey's HSD test).
